# Supplementary material
Source: PubMed Central journal article supplement (PMC10124916)
Supplement: mmc1.pdf [file mmc1.pdf]

**A****HEALTHY DONOR 1****HEALTHY DONOR 2****HEALTHY DONOR 3****PMA-activated cells**

ISOTYPE CONTROL

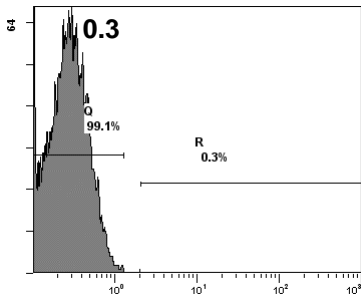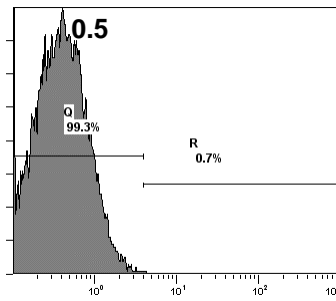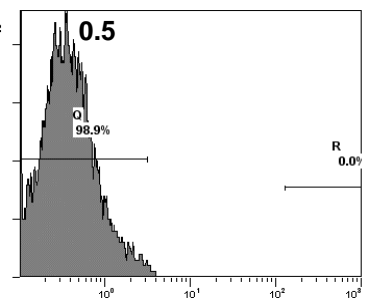**ANTI-PR3 (WGM2)**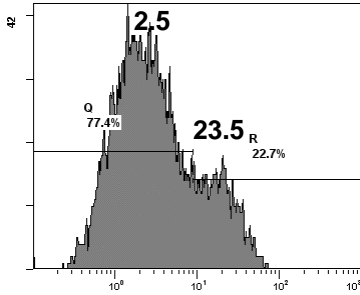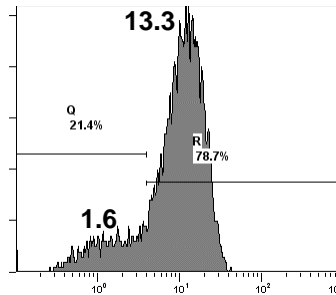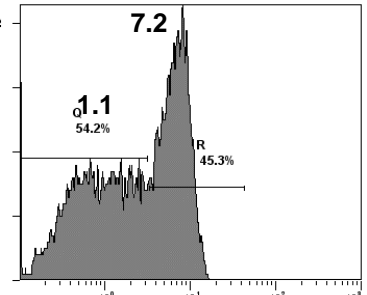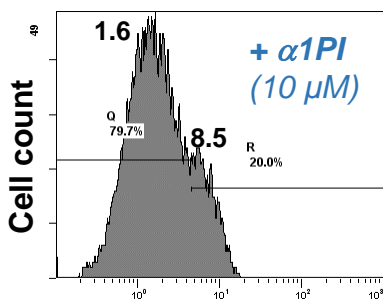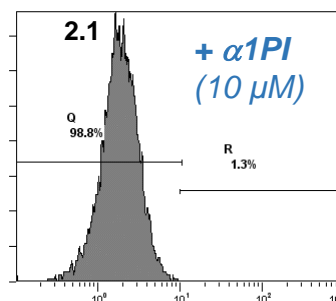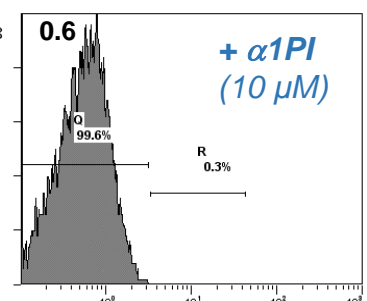

Fluorescence

PR3<sup>mb</sup> amount: 36.2%

Fluorescence

PR3<sup>mb</sup> amount: 15.6%

Fluorescence

PR3<sup>mb</sup> amount: 8.3%**B****HEALTHY DONOR 4****HEALTHY DONOR 5****HEALTHY DONOR 6****A23187-activated cells**

ISOTYPE CONTROL

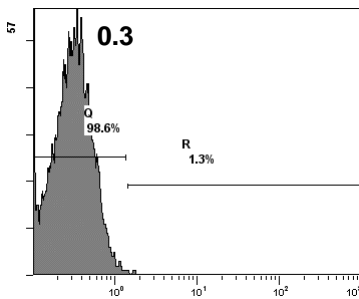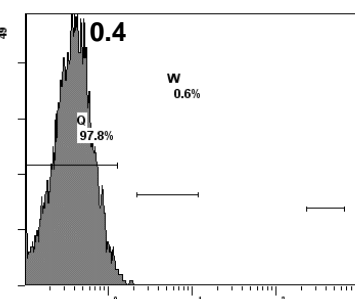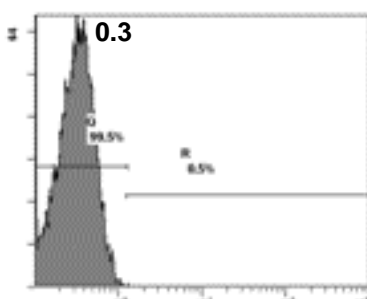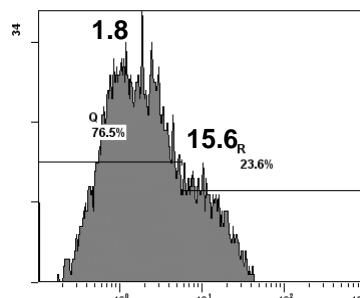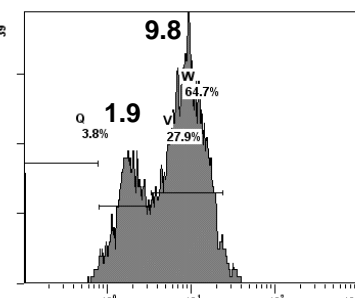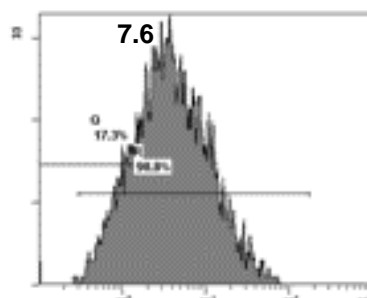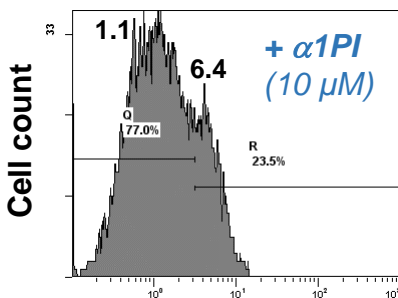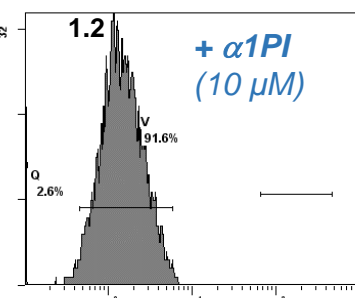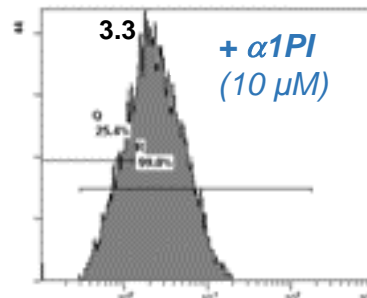

Fluorescence

PR3<sup>mb</sup> amount: 41.2%

Fluorescence

PR3<sup>mb</sup> amount: 12.2%

Fluorescence

PR3<sup>mb</sup> amount: 43.4%
