# Supplementary material
Source: PubMed Central journal article supplement (PMC10124916)

**Healthy Donor 11**  
**fMLP activated neutrophils**

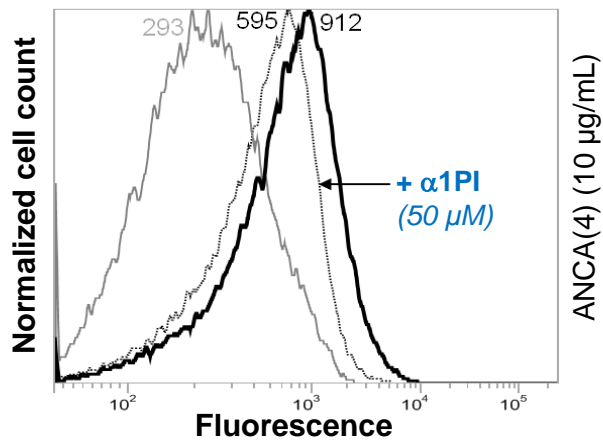

**PR3<sup>mb</sup> amount: 65.3%**

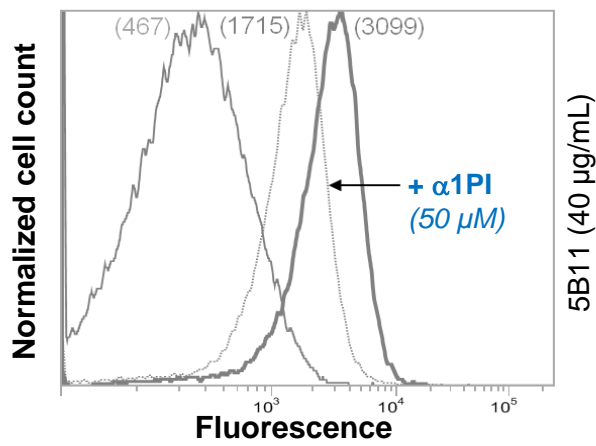

**PR3<sup>mb</sup> amount: 55.3%**

Supplement: mmc3.pdf [file mmc3.pdf]
